# Supplementary material
Source: publisher figshare collection journal article supplement (https://acs.figshare.com/ndownloader/files/3875245)
Supplement: Supplementary file 1 [file 3875245]

 
data_LIBGLU 
 
_audit_creation_method            SHELXL-97 
_chemical_name_systematic 
; 
 ? 
; 
_chemical_name_common             ? 
_chemical_melting_point           ? 
_chemical_formula_moiety          ? 
_chemical_formula_sum 
 'C36 H72 Br3 Li3 O36' 
_chemical_formula_weight          1341.49 
_chemical_absolute_configuration  ad
 
loop_ 
 _atom_type_symbol 
 _atom_type_description 
 _atom_type_scat_dispersion_real 
 _atom_type_scat_dispersion_imag 
 _atom_type_scat_source 
 'C'  'C'   0.0181   0.0091 
 'International Tables Vol C Tables 4.2.6.8 and 6.1.1.4' 
 'H'  'H'   0.0000   0.0000 
 'International Tables Vol C Tables 4.2.6.8 and 6.1.1.4' 
 'Li'  'Li'   0.0008   0.0003 
 'International Tables Vol C Tables 4.2.6.8 and 6.1.1.4' 
 'O'  'O'   0.0492   0.0322 
 'International Tables Vol C Tables 4.2.6.8 and 6.1.1.4' 
 'Br'  'Br'  -0.6763   1.2805 
 'International Tables Vol C Tables 4.2.6.8 and 6.1.1.4' 
 
_symmetry_cell_setting            trigonal 
_symmetry_space_group_name_H-M    P31 
 
loop_ 
 _symmetry_equiv_pos_as_xyz 
 'x, y, z' 
 '-y, x-y, z+1/3' 
 '-x+y, -x, z+2/3' 
 
_cell_length_a                    16.2665(2) 
_cell_length_b                    16.2665(2) 
_cell_length_c                    17.0945(5) 
_cell_angle_alpha                 90.00 
_cell_angle_beta                  90.00 
_cell_angle_gamma                 120.00 
_cell_volume                      3917.19(13) 
_cell_formula_units_Z             3 
_cell_measurement_temperature     293(2) 
_cell_measurement_reflns_used     ? 
_cell_measurement_theta_min       ? 
_cell_measurement_theta_max       ? 
 
_exptl_crystal_description        rod 
_exptl_crystal_colour             colorless 
_exptl_crystal_size_max           0.31 
_exptl_crystal_size_mid           0.23 
_exptl_crystal_size_min           0.11 
_exptl_crystal_density_meas       ? 
_exptl_crystal_density_diffrn     1.706 
_exptl_crystal_density_method     'not measured' 
_exptl_crystal_F_000              2070 
_exptl_absorpt_coefficient_mu     3.802 
_exptl_absorpt_correction_type    multi-scan 
_exptl_absorpt_correction_T_min   0.3853 
_exptl_absorpt_correction_T_max   0.6798 
_exptl_absorpt_process_details    'SADABS; (Sheldrick, 2003)' 
 
_exptl_special_details 
; 
 ? 
; 
 
_diffrn_ambient_temperature       293(2) 
_diffrn_radiation_wavelength      1.54178 
_diffrn_radiation_type            CuK\a 
_diffrn_radiation_source          'fine-focus sealed tube' 
_diffrn_radiation_monochromator   graphite 
_diffrn_measurement_device_type   'BRUKER SMART APEXII CCD'
_diffrn_measurement_method        'omega scans'
_diffrn_detector_area_resol_mean  ? 
_diffrn_reflns_number             19322 
_diffrn_reflns_av_R_equivalents   0.0394 
_diffrn_reflns_av_sigmaI/netI     0.0558 
_diffrn_reflns_limit_h_min        -19 
_diffrn_reflns_limit_h_max        19 
_diffrn_reflns_limit_k_min        -18 
_diffrn_reflns_limit_k_max        16 
_diffrn_reflns_limit_l_min        -16 
_diffrn_reflns_limit_l_max        19 
_diffrn_reflns_theta_min          3.14 
_diffrn_reflns_theta_max          66.41 
_reflns_number_total              7379 
_reflns_number_gt                 6991 
_reflns_threshold_expression      >2sigma(I) 
 
_computing_data_collection        'APEX2 (Bruker, 2010)'
_computing_cell_refinement        'APEX2 (Bruker, 2010); SAINT (Bruker, 2009)'
_computing_data_reduction         'SAINT (Bruker, 2009);XPREP(Sheldrick,2008)'
_computing_structure_solution     'SHELXS-97 (Sheldrick, 2008)' 
_computing_structure_refinement   'SHELXTL (Sheldrick, 2008), OLEX2 (2009)' 
_computing_molecular_graphics     ?
_computing_publication_material   'OLEX2 (Dolomanov,2009)'
_publ_section_references
;

Bruker AXS. (2010). APEX2 Bruker AXS, Inc. Madison, Wisconsin, USA.

Bruker AXS. (2009). SAINT Bruker AXS, Inc. Madison, Wisconsin, USA.

Sheldrick, G. M. (2008). SADABS. University of G\"ottingen, Germany.

Sheldrick, G. M. (2008). Acta Cryst. A64, 112-122.

Dolomanov, O.V.; Bourhis, L.J.; Gildea, R.J.; Howard, J.A.K.; 
Puschmann, H., OLEX2: A complete structure solution, refinement 
and analysis program (2009). J. Appl. Cryst., 42, 339-341. 

;  
_refine_special_details 
; 
 Refinement of F^2^ against ALL reflections.  The weighted R-factor wR and 
 goodness of fit S are based on F^2^, conventional R-factors R are based 
 on F, with F set to zero for negative F^2^. The threshold expression of 
 F^2^ > 2sigma(F^2^) is used only for calculating R-factors(gt) etc. and is 
 not relevant to the choice of reflections for refinement.  R-factors based 
 on F^2^ are statistically about twice as large as those based on F, and R- 
 factors based on ALL data will be even larger. 
; 
 
_refine_ls_structure_factor_coef  Fsqd  
_refine_ls_matrix_type            full 
_refine_ls_weighting_scheme       calc  
_refine_ls_weighting_details 
 'calc w=1/[\s^2^(Fo^2^)+(0.0370P)^2^+0.4859P] where P=(Fo^2^+2Fc^2^)/3' 
_atom_sites_solution_primary      direct 
_atom_sites_solution_secondary    difmap 
_atom_sites_solution_hydrogens    geom 
_refine_ls_hydrogen_treatment     mixed 
_refine_ls_extinction_method      none 
_refine_ls_extinction_coef        ? 
_refine_ls_abs_structure_details 
 'Flack H D (1983), Acta Cryst. A39, 876-881' 
_refine_ls_abs_structure_Flack    0.003(11) 
_refine_ls_number_reflns          7379 
_refine_ls_number_parameters      781 
_refine_ls_number_restraints      19 
_refine_ls_R_factor_all           0.0366 
_refine_ls_R_factor_gt            0.0341 
_refine_ls_wR_factor_ref          0.0782 
_refine_ls_wR_factor_gt           0.0771 
_refine_ls_goodness_of_fit_ref    1.044 
_refine_ls_restrained_S_all       1.044 
_refine_ls_shift/su_max           0.000 
_refine_ls_shift/su_mean          0.000 
 
loop_ 
 _atom_site_label 
 _atom_site_type_symbol 
 _atom_site_fract_x 
 _atom_site_fract_y 
 _atom_site_fract_z 
 _atom_site_U_iso_or_equiv 
 _atom_site_adp_type 
 _atom_site_occupancy 
 _atom_site_symmetry_multiplicity 
 _atom_site_calc_flag 
 _atom_site_refinement_flags 
 _atom_site_disorder_assembly 
 _atom_site_disorder_group 
Br1 Br 0.78573(3) 0.87000(4) 0.16796(2) 0.04137(13) Uani 1 1 d . . . 
Br2 Br 0.79722(4) 0.25408(4) 0.49346(3) 0.04159(13) Uani 1 1 d . . . 
Br3 Br 0.40094(3) 0.52081(3) 0.50539(3) 0.03913(12) Uani 1 1 d . . . 
O14 O 0.3791(2) 0.8572(2) 0.41797(16) 0.0291(6) Uani 1 1 d D . . 
H14 H 0.348(3) 0.885(3) 0.401(3) 0.044 Uiso 1 1 d D . . 
C39 C 0.1651(3) 0.2198(3) 0.5042(2) 0.0224(8) Uani 1 1 d . . . 
H39 H 0.2243 0.2594 0.5328 0.027 Uiso 1 1 calc R . . 
C5 C 0.4732(2) 0.8487(2) 0.0547(2) 0.0202(7) Uani 1 1 d . . . 
H5 H 0.4592 0.8892 0.0213 0.024 Uiso 1 1 calc R . . 
C37 C 0.0592(3) 0.1801(2) 0.6212(2) 0.0210(7) Uani 1 1 d . . . 
H37 H 0.1123 0.2203 0.6559 0.025 Uiso 1 1 calc RD . . 
C18 C 0.3467(2) 0.8544(2) 0.5833(2) 0.0216(7) Uani 1 1 d . . . 
H18 H 0.2926 0.8109 0.5508 0.026 Uiso 1 1 calc R . . 
C4 C 0.4012(3) 0.8097(2) 0.1204(2) 0.0228(7) Uani 1 1 d . . . 
H4 H 0.4104 0.7634 0.1502 0.027 Uiso 1 1 calc R . . 
C36 C 0.0196(3) 0.2394(2) 0.5852(2) 0.0234(8) Uani 1 1 d . . . 
H36 H -0.0346 0.1986 0.5517 0.028 Uiso 1 1 calc R . . 
C25 C 0.6745(2) 0.4623(3) 0.1238(2) 0.0228(7) Uani 1 1 d . . . 
H25 H 0.6751 0.4127 0.1560 0.027 Uiso 1 1 calc R . . 
C21 C 0.4489(3) 0.9204(3) 0.4701(2) 0.0237(8) Uani 1 1 d . . . 
H21 H 0.4897 0.9808 0.4436 0.028 Uiso 1 1 calc R . . 
C8 C 0.1697(3) 0.2567(3) 0.2027(2) 0.0255(8) Uani 1 1 d . . . 
H8 H 0.1940 0.3184 0.2286 0.031 Uiso 1 1 calc R . . 
C27 C 0.8042(3) 0.5980(3) 0.1981(2) 0.0256(8) Uani 1 1 d . . . 
H27 H 0.8205 0.6568 0.2260 0.031 Uiso 1 1 calc R . . 
C7 C 0.1924(3) 0.1853(3) 0.0862(2) 0.0238(8) Uani 1 1 d . . . 
H7 H 0.2003 0.1388 0.1169 0.029 Uiso 1 1 calc R . . 
C2 C 0.5148(3) 0.9484(3) 0.2022(2) 0.0251(8) Uani 1 1 d . . . 
H2 H 0.5210 1.0028 0.2318 0.030 Uiso 1 1 calc R . . 
C23 C 0.8464(2) 0.5386(2) 0.0846(2) 0.0235(8) Uani 1 1 d . . . 
H23 H 0.8575 0.4956 0.1172 0.028 Uiso 1 1 calc R . . 
C26 C 0.7001(3) 0.5484(3) 0.1744(2) 0.0234(7) Uani 1 1 d . . . 
H26 H 0.6871 0.5929 0.1457 0.028 Uiso 1 1 calc R . . 
C3 C 0.4137(3) 0.8886(3) 0.1750(2) 0.0223(8) Uani 1 1 d . . . 
H3 H 0.3939 0.9291 0.1481 0.027 Uiso 1 1 calc RD . . 
C12 C 0.2582(3) 0.2151(3) 0.0168(2) 0.0341(9) Uani 1 1 d . . . 
H12A H 0.3228 0.2401 0.0353 0.041 Uiso 1 1 calc R . . 
H12B H 0.2422 0.1597 -0.0151 0.041 Uiso 1 1 calc R . . 
C20 C 0.5069(2) 0.8745(3) 0.4927(2) 0.0221(7) Uani 1 1 d . . . 
H20 H 0.5619 0.9193 0.5237 0.027 Uiso 1 1 calc R . . 
C10 C 0.0266(2) 0.1267(3) 0.1360(2) 0.0235(8) Uani 1 1 d . . . 
H10 H 0.0253 0.0761 0.1681 0.028 Uiso 1 1 calc R . . 
C22 C 0.3113(3) 0.8876(3) 0.6505(2) 0.0311(9) Uani 1 1 d . . . 
H22A H 0.2769 0.9174 0.6300 0.037 Uiso 1 1 calc R . . 
H22B H 0.2672 0.8330 0.6811 0.037 Uiso 1 1 calc R . . 
C40 C 0.1246(3) 0.2803(3) 0.4748(2) 0.0269(8) Uani 1 1 d . . . 
H40 H 0.1742 0.3349 0.4463 0.032 Uiso 1 1 calc R . . 
C41 C -0.0113(3) 0.2854(3) 0.6460(2) 0.0310(8) Uani 1 1 d . . . 
H41A H -0.0335 0.3236 0.6198 0.037 Uiso 1 1 calc R . . 
H41B H -0.0642 0.2362 0.6752 0.037 Uiso 1 1 calc R . . 
C24 C 0.7437(2) 0.4864(2) 0.0559(2) 0.0218(7) Uani 1 1 d . . . 
H24 H 0.7345 0.5267 0.0184 0.026 Uiso 1 1 calc R . . 
C6 C 0.6463(3) 0.9536(3) 0.0244(2) 0.0334(9) Uani 1 1 d . . . 
H6A H 0.7080 0.9919 0.0484 0.040 Uiso 1 1 calc R . . 
H6B H 0.6484 0.9047 -0.0065 0.040 Uiso 1 1 calc R . . 
C11 C 0.0884(3) 0.1425(2) 0.0644(2) 0.0228(7) Uani 1 1 d . . . 
H11 H 0.0817 0.1859 0.0287 0.027 Uiso 1 1 calc R . . 
C19 C 0.4477(2) 0.7845(3) 0.5397(2) 0.0227(7) Uani 1 1 d . . . 
H19 H 0.3986 0.7361 0.5060 0.027 Uiso 1 1 calc R . . 
C28 C 0.9185(3) 0.5760(3) 0.0188(2) 0.0307(9) Uani 1 1 d . . . 
H28A H 0.9817 0.6082 0.0412 0.037 Uiso 1 1 calc R . . 
H28B H 0.9121 0.5227 -0.0115 0.037 Uiso 1 1 calc R . . 
C1 C 0.5725(2) 0.9075(2) 0.0875(2) 0.0225(7) Uani 1 1 d . . . 
H1 H 0.5875 0.8663 0.1188 0.027 Uiso 1 1 calc R . . 
C9 C 0.0660(3) 0.2169(3) 0.1844(2) 0.0238(8) Uani 1 1 d . . . 
H9 H 0.0579 0.2644 0.1554 0.029 Uiso 1 1 calc RD . . 
O15 O 0.40841(19) 0.93692(17) 0.53816(15) 0.0261(5) Uani 1 1 d . . . 
O7 O 0.17603(19) 0.19350(19) 0.25456(16) 0.0307(6) Uani 1 1 d D . . 
O1 O 0.5337(2) 0.8906(2) 0.25220(16) 0.0320(6) Uani 1 1 d D . . 
O10 O 0.0598(2) 0.0555(2) 0.02489(17) 0.0330(6) Uani 1 1 d . . . 
O17 O 0.33371(19) 0.71794(18) 0.64632(17) 0.0288(6) Uani 1 1 d . . . 
O11 O 0.22228(17) 0.26922(16) 0.13273(15) 0.0247(5) Uani 1 1 d . . . 
O4 O 0.4672(2) 0.77324(18) 0.00906(16) 0.0320(6) Uani 1 1 d . . . 
H4A H 0.4547 0.7791 -0.0363 0.048 Uiso 1 1 calc R . . 
O2 O 0.35527(19) 0.8474(2) 0.24248(15) 0.0302(6) Uani 1 1 d D . . 
O5 O 0.57780(18) 0.98184(17) 0.13695(15) 0.0262(5) Uani 1 1 d . . . 
O13 O 0.53838(18) 0.8530(2) 0.42219(16) 0.0304(6) Uani 1 1 d D . . 
O8 O 0.0172(2) 0.1983(2) 0.25686(16) 0.0342(6) Uani 1 1 d D . . 
O9 O -0.0672(2) 0.0997(2) 0.11272(19) 0.0401(7) Uani 1 1 d . . . 
H9A H -0.1026 0.0435 0.1230 0.060 Uiso 1 1 calc R . . 
O12 O 0.2537(2) 0.2851(2) -0.03028(18) 0.0431(7) Uani 1 1 d . . . 
H12 H 0.2129 0.2589 -0.0640 0.065 Uiso 1 1 calc R . . 
O16 O 0.5079(2) 0.7510(2) 0.56798(18) 0.0362(6) Uani 1 1 d . . . 
H16 H 0.4813 0.6931 0.5630 0.054 Uiso 1 1 calc R . . 
O6 O 0.6272(2) 1.0122(2) -0.02598(17) 0.0385(7) Uani 1 1 d . . . 
H6 H 0.5872 0.9789 -0.0584 0.058 Uiso 1 1 calc R . . 
O3 O 0.31013(19) 0.7627(2) 0.08558(17) 0.0413(8) Uani 1 1 d . . . 
H3A H 0.2695 0.7472 0.1196 0.062 Uiso 1 1 calc R . . 
O18 O 0.3852(3) 0.9532(2) 0.70043(18) 0.0440(8) Uani 1 1 d . . . 
H18A H 0.4051 0.9249 0.7270 0.066 Uiso 1 1 calc R . . 
O23 O 0.86264(18) 0.61949(18) 0.13053(15) 0.0259(6) Uani 1 1 d . . . 
O20 O 0.6465(2) 0.5206(2) 0.24497(16) 0.0326(6) Uani 1 1 d D . . 
O19 O 0.81289(18) 0.5352(2) 0.24901(16) 0.0311(6) Uani 1 1 d D . . 
O21 O 0.58200(19) 0.4280(2) 0.09342(18) 0.0385(7) Uani 1 1 d . . . 
H21A H 0.5502 0.3706 0.1006 0.058 Uiso 1 1 calc R . . 
O22 O 0.72807(19) 0.40237(18) 0.01745(16) 0.0302(6) Uani 1 1 d D . . 
O24 O 0.9089(2) 0.6395(2) -0.03203(18) 0.0437(7) Uani 1 1 d . . . 
H24A H 0.8739 0.6098 -0.0686 0.066 Uiso 1 1 calc R . . 
O26 O 0.6721(2) 0.5387(2) 0.41769(16) 0.0303(6) Uani 1 1 d D . . 
O28 O 0.6417(2) 0.42438(19) 0.66106(17) 0.0356(6) Uani 1 1 d . . . 
O29 O 0.6949(2) 0.6554(2) 0.69702(17) 0.0391(7) Uani 1 1 d . . . 
H29 H 0.7050 0.6254 0.7304 0.059 Uiso 1 1 calc RD . . 
O25 O 0.8209(2) 0.5160(2) 0.42318(16) 0.0335(6) Uani 1 1 d D . . 
O27 O 0.7938(3) 0.4307(3) 0.57912(18) 0.0451(8) Uani 1 1 d . . . 
H27A H 0.7932 0.3911 0.5491 0.068 Uiso 1 1 calc R . . 
O30 O 0.71348(19) 0.62888(17) 0.53303(15) 0.0265(5) Uani 1 1 d . . . 
C32 C 0.7402(3) 0.4687(3) 0.5468(2) 0.0240(8) Uani 1 1 d . . . 
H32 H 0.6861 0.4188 0.5181 0.029 Uiso 1 1 calc R . . 
C34 C 0.7466(3) 0.6019(3) 0.4663(2) 0.0241(8) Uani 1 1 d . . . 
H34A H 0.7899 0.6587 0.4364 0.029 Uiso 1 1 calc R . . 
C31 C 0.7043(3) 0.5025(2) 0.6139(2) 0.0217(7) Uani 1 1 d . . . 
H31A H 0.7584 0.5474 0.6457 0.026 Uiso 1 1 calc R . . 
C30 C 0.6517(2) 0.5518(2) 0.5836(2) 0.0224(7) Uani 1 1 d . . . 
H30 H 0.5962 0.5060 0.5536 0.027 Uiso 1 1 calc R . . 
C33 C 0.7991(3) 0.5504(3) 0.4921(2) 0.0240(8) Uani 1 1 d . . . 
H33A H 0.8583 0.5956 0.5183 0.029 Uiso 1 1 calc R . . 
C29 C 0.6192(3) 0.5914(3) 0.6479(2) 0.0333(9) Uani 1 1 d . . . 
H29A H 0.5889 0.6242 0.6251 0.040 Uiso 1 1 calc R . . 
H29B H 0.5722 0.5395 0.6794 0.040 Uiso 1 1 calc R . . 
C35 C 0.4004(3) 0.8041(2) 0.6093(2) 0.0213(7) Uani 1 1 d . . . 
H35 H 0.4494 0.8442 0.6472 0.026 Uiso 1 1 calc R . . 
C38 C 0.0938(3) 0.1404(3) 0.5572(2) 0.0253(8) Uani 1 1 d . . . 
H38 H 0.0396 0.0947 0.5259 0.030 Uiso 1 1 calc R . . 
O36 O 0.0517(2) 0.2237(2) 0.42295(16) 0.0345(7) Uani 1 1 d D . . 
O33 O -0.0137(2) 0.10442(18) 0.66526(16) 0.0310(6) Uani 1 1 d D . . 
O34 O 0.1362(3) 0.0933(2) 0.59473(18) 0.0438(8) Uani 1 1 d . . . 
H34 H 0.1351 0.0530 0.5653 0.066 Uiso 1 1 calc R . . 
O32 O 0.09263(19) 0.31388(18) 0.53836(15) 0.0271(6) Uani 1 1 d . . . 
O31 O 0.0616(2) 0.34337(19) 0.69892(17) 0.0382(7) Uani 1 1 d . . . 
H31 H 0.0656 0.3102 0.7331 0.057 Uiso 1 1 calc R . . 
O35 O 0.18326(19) 0.1777(2) 0.43762(15) 0.0304(6) Uani 1 1 d D . . 
H35A H 0.2415(18) 0.189(4) 0.439(3) 0.046 Uiso 1 1 d D . . 
Li1 Li 0.7086(5) 0.4683(5) 0.3353(4) 0.0353(16) Uani 1 1 d . . . 
Li2 Li 0.0730(5) 0.1378(5) 0.3435(4) 0.0376(15) Uani 1 1 d . . . 
Li3 Li 0.4244(6) 0.8064(5) 0.3296(4) 0.0376(16) Uani 1 1 d . . . 
H13 H 0.5989(15) 0.876(3) 0.422(3) 0.044(14) Uiso 1 1 d D . . 
H20A H 0.600(2) 0.533(3) 0.242(2) 0.025(10) Uiso 1 1 d D . . 
H8A H -0.028(3) 0.213(3) 0.2610(19) 0.056(16) Uiso 1 1 d D . . 
H2A H 0.302(2) 0.851(3) 0.245(2) 0.051(15) Uiso 1 1 d D . . 
H17 H 0.364(3) 0.702(3) 0.671(3) 0.030(12) Uiso 1 1 d . . . 
H1A H 0.5907(17) 0.929(3) 0.267(3) 0.031(12) Uiso 1 1 d D . . 
H26A H 0.651(4) 0.578(3) 0.409(4) 0.065(18) Uiso 1 1 d D . . 
H33 H -0.008(3) 0.107(4) 0.7170(12) 0.10(3) Uiso 1 1 d D . . 
H28 H 0.653(4) 0.440(4) 0.714(3) 0.047(14) Uiso 1 1 d . . . 
H22 H 0.672(2) 0.377(4) -0.002(3) 0.059(17) Uiso 1 1 d D . . 
H25A H 0.878(2) 0.524(4) 0.424(3) 0.054(16) Uiso 1 1 d D . . 
H10A H 0.007(4) 0.036(4) 0.011(3) 0.052(17) Uiso 1 1 d . . . 
H7A H 0.2359(18) 0.224(4) 0.268(3) 0.063(18) Uiso 1 1 d D . . 
H36A H 0.031(3) 0.255(4) 0.397(3) 0.067(18) Uiso 1 1 d D . . 
H19A H 0.867(3) 0.557(4) 0.276(3) 0.068(19) Uiso 1 1 d D . . 
 
loop_ 
 _atom_site_aniso_label 
 _atom_site_aniso_U_11 
 _atom_site_aniso_U_22 
 _atom_site_aniso_U_33 
 _atom_site_aniso_U_23 
 _atom_site_aniso_U_13 
 _atom_site_aniso_U_12 
Br1 0.0339(2) 0.0575(3) 0.0302(3) -0.0061(2) -0.00114(17) 0.0209(2) 
Br2 0.0537(3) 0.0531(3) 0.0297(2) 0.00566(19) 0.00517(18) 0.0355(2) 
Br3 0.0472(3) 0.0540(3) 0.0289(2) 0.00496(19) 0.00361(18) 0.0348(2) 
O14 0.0341(15) 0.0387(15) 0.0232(14) -0.0072(11) -0.0107(11) 0.0248(13) 
C39 0.0207(18) 0.0281(19) 0.017(2) -0.0056(14) -0.0030(14) 0.0112(15) 
C5 0.0253(18) 0.0183(17) 0.0169(18) 0.0000(13) 0.0005(13) 0.0108(15) 
C37 0.0248(18) 0.0176(17) 0.0181(18) 0.0003(14) 0.0008(14) 0.0087(15) 
C18 0.0215(18) 0.0156(17) 0.026(2) 0.0007(14) -0.0020(14) 0.0077(14) 
C4 0.0214(18) 0.0207(17) 0.0197(19) 0.0005(14) -0.0002(14) 0.0055(15) 
C36 0.0241(19) 0.0218(18) 0.024(2) 0.0016(14) -0.0006(14) 0.0112(15) 
C25 0.0204(18) 0.0255(19) 0.024(2) 0.0010(14) -0.0027(14) 0.0126(15) 
C21 0.028(2) 0.0173(18) 0.023(2) 0.0014(14) 0.0009(15) 0.0089(16) 
C8 0.029(2) 0.0231(19) 0.020(2) -0.0001(15) 0.0001(15) 0.0103(16) 
C27 0.028(2) 0.0250(19) 0.0190(19) 0.0008(14) -0.0005(15) 0.0092(17) 
C7 0.0251(19) 0.0190(18) 0.026(2) 0.0018(14) -0.0002(15) 0.0101(15) 
C2 0.030(2) 0.0269(19) 0.0153(19) -0.0020(14) -0.0001(15) 0.0120(17) 
C23 0.0223(18) 0.0205(18) 0.026(2) 0.0013(14) -0.0023(15) 0.0097(15) 
C26 0.029(2) 0.0285(19) 0.0187(19) 0.0018(14) -0.0014(14) 0.0189(16) 
C3 0.025(2) 0.0259(19) 0.019(2) 0.0032(14) 0.0029(14) 0.0154(16) 
C12 0.033(2) 0.029(2) 0.038(3) -0.0002(17) 0.0047(18) 0.0139(17) 
C20 0.0182(17) 0.0242(18) 0.0208(19) -0.0034(14) -0.0039(14) 0.0082(15) 
C10 0.0178(18) 0.0238(18) 0.029(2) 0.0009(14) -0.0012(14) 0.0106(15) 
C22 0.038(2) 0.029(2) 0.029(2) 0.0001(16) 0.0056(16) 0.0189(18) 
C40 0.034(2) 0.027(2) 0.0187(19) 0.0031(15) 0.0040(15) 0.0147(17) 
C41 0.033(2) 0.036(2) 0.032(2) 0.0007(17) 0.0032(16) 0.0223(18) 
C24 0.0236(18) 0.0183(18) 0.0231(19) 0.0010(13) -0.0018(14) 0.0102(15) 
C6 0.0233(19) 0.036(2) 0.036(2) 0.0045(17) 0.0096(16) 0.0113(17) 
C11 0.0261(19) 0.0187(17) 0.023(2) -0.0014(13) -0.0039(14) 0.0110(15) 
C19 0.0196(17) 0.0236(18) 0.027(2) -0.0029(14) -0.0044(14) 0.0122(15) 
C28 0.0241(19) 0.030(2) 0.034(2) -0.0023(16) 0.0026(16) 0.0106(16) 
C1 0.0201(18) 0.0229(18) 0.0233(19) 0.0044(14) 0.0021(14) 0.0097(15) 
C9 0.037(2) 0.0222(18) 0.017(2) 0.0022(14) 0.0030(15) 0.0180(17) 
O15 0.0370(15) 0.0178(12) 0.0259(14) 0.0005(10) 0.0011(11) 0.0155(11) 
O7 0.0284(15) 0.0343(15) 0.0252(15) 0.0064(11) -0.0021(11) 0.0126(12) 
O1 0.0284(15) 0.0407(16) 0.0213(15) 0.0041(11) -0.0026(11) 0.0132(13) 
O10 0.0292(16) 0.0316(15) 0.0367(17) -0.0143(12) -0.0102(12) 0.0142(12) 
O17 0.0292(15) 0.0246(14) 0.0347(16) 0.0110(11) 0.0036(12) 0.0150(12) 
O11 0.0239(13) 0.0165(12) 0.0245(14) -0.0010(10) 0.0008(10) 0.0033(10) 
O4 0.0474(17) 0.0220(13) 0.0236(14) -0.0030(11) 0.0050(12) 0.0152(13) 
O2 0.0292(15) 0.0434(16) 0.0234(15) 0.0063(11) 0.0097(11) 0.0222(13) 
O5 0.0255(13) 0.0209(13) 0.0226(14) 0.0004(10) 0.0028(10) 0.0045(11) 
O13 0.0226(14) 0.0435(16) 0.0242(14) -0.0036(12) 0.0008(11) 0.0158(13) 
O8 0.0421(17) 0.0482(17) 0.0234(15) 0.0014(12) 0.0060(12) 0.0309(15) 
O9 0.0263(15) 0.0420(17) 0.0507(19) -0.0041(14) -0.0066(13) 0.0162(13) 
O12 0.0464(19) 0.0325(16) 0.0329(18) 0.0091(12) 0.0025(13) 0.0067(14) 
O16 0.0387(16) 0.0410(16) 0.0410(17) 0.0078(13) -0.0015(12) 0.0289(14) 
O6 0.0381(16) 0.0255(14) 0.0319(17) 0.0082(11) 0.0040(12) 0.0010(12) 
O3 0.0203(14) 0.0507(19) 0.0316(17) -0.0068(13) 0.0010(12) 0.0019(13) 
O18 0.079(2) 0.0315(15) 0.0287(16) -0.0082(12) -0.0092(15) 0.0327(16) 
O23 0.0254(13) 0.0206(13) 0.0222(14) -0.0019(10) 0.0019(10) 0.0044(11) 
O20 0.0360(15) 0.0486(17) 0.0249(15) 0.0046(12) 0.0050(11) 0.0300(14) 
O19 0.0255(14) 0.0424(16) 0.0239(15) 0.0065(11) -0.0049(11) 0.0158(12) 
O21 0.0201(14) 0.0445(17) 0.0481(18) -0.0087(14) -0.0081(12) 0.0139(13) 
O22 0.0273(14) 0.0282(14) 0.0323(15) -0.0118(11) -0.0081(11) 0.0118(12) 
O24 0.0443(18) 0.0355(16) 0.0289(17) 0.0078(12) -0.0007(13) 0.0033(14) 
O26 0.0384(15) 0.0357(15) 0.0230(15) -0.0041(11) -0.0074(11) 0.0233(13) 
O28 0.0514(18) 0.0258(14) 0.0232(16) 0.0083(11) 0.0092(13) 0.0145(13) 
O29 0.064(2) 0.0310(15) 0.0284(16) -0.0087(12) -0.0065(13) 0.0279(15) 
O25 0.0331(15) 0.0492(17) 0.0227(15) -0.0077(12) 0.0058(11) 0.0239(14) 
O27 0.073(2) 0.060(2) 0.0304(17) -0.0002(14) -0.0032(15) 0.0548(19) 
O30 0.0408(15) 0.0192(12) 0.0223(13) 0.0009(10) 0.0033(11) 0.0170(12) 
C32 0.0291(19) 0.0247(19) 0.023(2) 0.0003(14) 0.0004(15) 0.0173(17) 
C34 0.031(2) 0.0211(18) 0.0198(19) 0.0024(14) 0.0011(15) 0.0132(16) 
C31 0.0251(18) 0.0192(17) 0.0184(19) -0.0002(13) 0.0007(14) 0.0093(15) 
C30 0.0218(18) 0.0233(18) 0.0203(19) 0.0016(14) 0.0013(14) 0.0099(15) 
C33 0.0258(19) 0.029(2) 0.016(2) -0.0039(14) -0.0028(14) 0.0131(16) 
C29 0.038(2) 0.039(2) 0.031(2) -0.0023(17) -0.0009(17) 0.0257(19) 
C35 0.0234(18) 0.0182(17) 0.0216(19) 0.0023(13) -0.0017(14) 0.0097(15) 
C38 0.032(2) 0.0266(19) 0.0205(19) -0.0002(15) 0.0001(15) 0.0166(17) 
O36 0.0441(17) 0.0469(18) 0.0233(15) -0.0050(12) -0.0103(12) 0.0309(15) 
O33 0.0377(15) 0.0206(13) 0.0246(16) 0.0049(10) 0.0080(11) 0.0070(12) 
O34 0.076(2) 0.0511(19) 0.0305(17) 0.0093(14) 0.0065(15) 0.0514(19) 
O32 0.0373(15) 0.0232(13) 0.0247(14) -0.0006(10) 0.0037(11) 0.0181(12) 
O31 0.0587(19) 0.0265(14) 0.0297(16) -0.0083(11) -0.0039(13) 0.0217(14) 
O35 0.0276(14) 0.0428(16) 0.0235(15) -0.0078(11) 0.0006(11) 0.0196(12) 
Li1 0.031(3) 0.035(4) 0.023(3) 0.000(3) 0.004(3) 0.004(3) 
Li2 0.046(4) 0.047(4) 0.017(3) -0.001(3) 0.006(3) 0.021(4) 
Li3 0.058(4) 0.032(4) 0.029(4) -0.002(3) 0.001(3) 0.028(3) 
 
_geom_special_details 
; 
 All esds (except the esd in the dihedral angle between two l.s. planes) 
 are estimated using the full covariance matrix.  The cell esds are taken 
 into account individually in the estimation of esds in distances, angles 
 and torsion angles; correlations between esds in cell parameters are only 
 used when they are defined by crystal symmetry.  An approximate (isotropic) 
 treatment of cell esds is used for estimating esds involving l.s. planes. 
; 
 
loop_ 
 _geom_bond_atom_site_label_1 
 _geom_bond_atom_site_label_2 
 _geom_bond_distance 
 _geom_bond_site_symmetry_2 
 _geom_bond_publ_flag 
O14 C21 1.405(5) . ? 
O14 Li3 2.030(7) . ? 
O14 H14 0.88(2) . ? 
C39 O35 1.433(4) . ? 
C39 C40 1.518(5) . ? 
C39 C38 1.528(5) . ? 
C39 H39 0.9800 . ? 
C5 O4 1.416(4) . ? 
C5 C1 1.514(5) . ? 
C5 C4 1.515(5) . ? 
C5 H5 0.9800 . ? 
C37 O33 1.425(4) . ? 
C37 C38 1.514(5) . ? 
C37 C36 1.530(5) . ? 
C37 H37 0.9800 . ? 
C18 O15 1.435(4) . ? 
C18 C22 1.502(5) . ? 
C18 C35 1.531(5) . ? 
C18 H18 0.9800 . ? 
C4 O3 1.415(5) . ? 
C4 C3 1.517(5) . ? 
C4 H4 0.9800 . ? 
C36 O32 1.442(4) . ? 
C36 C41 1.506(5) . ? 
C36 H36 0.9800 . ? 
C25 O21 1.416(4) . ? 
C25 C26 1.518(5) . ? 
C25 C24 1.526(5) . ? 
C25 H25 0.9800 . ? 
C21 O15 1.426(5) . ? 
C21 C20 1.517(5) . ? 
C21 H21 0.9800 . ? 
C8 O7 1.400(5) . ? 
C8 O11 1.425(5) . ? 
C8 C9 1.507(6) . ? 
C8 H8 0.9800 . ? 
C27 O19 1.401(5) . ? 
C27 O23 1.423(5) . ? 
C27 C26 1.523(5) . ? 
C27 H27 0.9800 . ? 
C7 O11 1.439(4) . ? 
C7 C12 1.506(5) . ? 
C7 C11 1.519(5) . ? 
C7 H7 0.9800 . ? 
C2 O1 1.413(5) . ? 
C2 O5 1.426(4) . ? 
C2 C3 1.506(6) . ? 
C2 H2 0.9800 . ? 
C23 O23 1.439(4) . ? 
C23 C28 1.516(5) . ? 
C23 C24 1.527(5) . ? 
C23 H23 0.9800 . ? 
C26 O20 1.423(5) . ? 
C26 H26 0.9800 . ? 
C3 O2 1.430(5) . ? 
C3 H3 0.9800 . ? 
C12 O12 1.426(5) . ? 
C12 H12A 0.9700 . ? 
C12 H12B 0.9700 . ? 
C20 O13 1.420(5) . ? 
C20 C19 1.519(5) . ? 
C20 H20 0.9800 . ? 
C10 O9 1.418(5) . ? 
C10 C9 1.519(5) . ? 
C10 C11 1.521(5) . ? 
C10 H10 0.9800 . ? 
C22 O18 1.425(5) . ? 
C22 H22A 0.9700 . ? 
C22 H22B 0.9700 . ? 
C40 O36 1.396(5) . ? 
C40 O32 1.426(5) . ? 
C40 H40 0.9800 . ? 
C41 O31 1.413(5) . ? 
C41 H41A 0.9700 . ? 
C41 H41B 0.9700 . ? 
C24 O22 1.420(4) . ? 
C24 H24 0.9800 . ? 
C6 O6 1.428(5) . ? 
C6 C1 1.506(5) . ? 
C6 H6A 0.9700 . ? 
C6 H6B 0.9700 . ? 
C11 O10 1.421(4) . ? 
C11 H11 0.9800 . ? 
C19 O16 1.423(4) . ? 
C19 C35 1.533(5) . ? 
C19 H19 0.9800 . ? 
C28 O24 1.417(5) . ? 
C28 H28A 0.9700 . ? 
C28 H28B 0.9700 . ? 
C1 O5 1.442(4) . ? 
C1 H1 0.9800 . ? 
C9 O8 1.421(5) . ? 
C9 H9 0.9800 . ? 
O7 Li2 2.103(7) . ? 
O7 H7A 0.87(2) . ? 
O1 Li3 2.085(8) . ? 
O1 H1A 0.86(2) . ? 
O10 Li2 2.147(8) 3_554 ? 
O10 H10A 0.78(6) . ? 
O17 C35 1.422(4) . ? 
O17 Li3 2.052(7) 2_665 ? 
O17 H17 0.78(5) . ? 
O4 H4A 0.8200 . ? 
O2 Li3 2.163(8) . ? 
O2 H2A 0.89(2) . ? 
O13 Li3 2.261(8) . ? 
O13 H13 0.86(2) . ? 
O8 Li2 2.209(8) . ? 
O8 H8A 0.87(2) . ? 
O9 H9A 0.8200 . ? 
O12 H12 0.8200 . ? 
O16 H16 0.8200 . ? 
O6 H6 0.8200 . ? 
O3 H3A 0.8200 . ? 
O18 H18A 0.8200 . ? 
O20 Li1 2.233(8) . ? 
O20 H20A 0.877(19) . ? 
O19 Li1 2.096(7) . ? 
O19 H19A 0.89(2) . ? 
O21 H21A 0.8200 . ? 
O22 Li1 2.126(7) 3_664 ? 
O22 H22 0.85(2) . ? 
O24 H24A 0.8200 . ? 
O26 C34 1.404(5) . ? 
O26 Li1 2.080(8) . ? 
O26 H26A 0.88(2) . ? 
O28 C31 1.417(4) . ? 
O28 Li1 2.613(8) 2_655 ? 
O28 H28 0.93(6) . ? 
O29 C29 1.422(5) . ? 
O29 H29 0.8200 . ? 
O25 C33 1.424(5) . ? 
O25 Li1 2.187(7) . ? 
O25 H25A 0.88(2) . ? 
O27 C32 1.408(5) . ? 
O27 H27A 0.8200 . ? 
O30 C34 1.422(5) . ? 
O30 C30 1.439(4) . ? 
C32 C31 1.509(5) . ? 
C32 C33 1.512(5) . ? 
C32 H32 0.9800 . ? 
C34 C33 1.529(5) . ? 
C34 H34A 0.9800 . ? 
C31 C30 1.526(5) . ? 
C31 H31A 0.9800 . ? 
C30 C29 1.498(5) . ? 
C30 H30 0.9800 . ? 
C33 H33A 0.9800 . ? 
C29 H29A 0.9700 . ? 
C29 H29B 0.9700 . ? 
C35 H35 0.9800 . ? 
C38 O34 1.416(5) . ? 
C38 H38 0.9800 . ? 
O36 Li2 2.098(7) . ? 
O36 H36A 0.868(19) . ? 
O33 Li2 2.477(8) 2 ? 
O33 H33 0.89(2) . ? 
O34 H34 0.8200 . ? 
O31 H31 0.8200 . ? 
O35 Li2 2.249(8) . ? 
O35 H35A 0.87(2) . ? 
Li1 O22 2.126(7) 2_655 ? 
Li1 O28 2.613(8) 3_664 ? 
Li2 O10 2.147(8) 2 ? 
Li2 O33 2.477(8) 3_554 ? 
Li3 O17 2.052(7) 3_564 ? 
 
loop_ 
 _geom_angle_atom_site_label_1 
 _geom_angle_atom_site_label_2 
 _geom_angle_atom_site_label_3 
 _geom_angle 
 _geom_angle_site_symmetry_1 
 _geom_angle_site_symmetry_3 
 _geom_angle_publ_flag 
C21 O14 Li3 116.5(3) . . ? 
C21 O14 H14 108(3) . . ? 
Li3 O14 H14 112(3) . . ? 
O35 C39 C40 107.8(3) . . ? 
O35 C39 C38 108.5(3) . . ? 
C40 C39 C38 110.6(3) . . ? 
O35 C39 H39 109.9 . . ? 
C40 C39 H39 109.9 . . ? 
C38 C39 H39 109.9 . . ? 
O4 C5 C1 109.9(3) . . ? 
O4 C5 C4 110.0(3) . . ? 
C1 C5 C4 110.3(3) . . ? 
O4 C5 H5 108.9 . . ? 
C1 C5 H5 108.9 . . ? 
C4 C5 H5 108.9 . . ? 
O33 C37 C38 109.9(3) . . ? 
O33 C37 C36 109.0(3) . . ? 
C38 C37 C36 110.0(3) . . ? 
O33 C37 H37 109.3 . . ? 
C38 C37 H37 109.3 . . ? 
C36 C37 H37 109.3 . . ? 
O15 C18 C22 106.8(3) . . ? 
O15 C18 C35 109.7(3) . . ? 
C22 C18 C35 113.2(3) . . ? 
O15 C18 H18 109.0 . . ? 
C22 C18 H18 109.0 . . ? 
C35 C18 H18 109.0 . . ? 
O3 C4 C5 107.2(3) . . ? 
O3 C4 C3 112.1(3) . . ? 
C5 C4 C3 110.7(3) . . ? 
O3 C4 H4 108.9 . . ? 
C5 C4 H4 108.9 . . ? 
C3 C4 H4 108.9 . . ? 
O32 C36 C41 107.7(3) . . ? 
O32 C36 C37 108.9(3) . . ? 
C41 C36 C37 112.7(3) . . ? 
O32 C36 H36 109.2 . . ? 
C41 C36 H36 109.2 . . ? 
C37 C36 H36 109.2 . . ? 
O21 C25 C26 108.6(3) . . ? 
O21 C25 C24 109.0(3) . . ? 
C26 C25 C24 111.7(3) . . ? 
O21 C25 H25 109.2 . . ? 
C26 C25 H25 109.2 . . ? 
C24 C25 H25 109.2 . . ? 
O14 C21 O15 112.0(3) . . ? 
O14 C21 C20 105.9(3) . . ? 
O15 C21 C20 110.2(3) . . ? 
O14 C21 H21 109.5 . . ? 
O15 C21 H21 109.5 . . ? 
C20 C21 H21 109.5 . . ? 
O7 C8 O11 112.1(3) . . ? 
O7 C8 C9 107.1(3) . . ? 
O11 C8 C9 110.4(3) . . ? 
O7 C8 H8 109.0 . . ? 
O11 C8 H8 109.0 . . ? 
C9 C8 H8 109.0 . . ? 
O19 C27 O23 112.7(3) . . ? 
O19 C27 C26 105.7(3) . . ? 
O23 C27 C26 110.1(3) . . ? 
O19 C27 H27 109.4 . . ? 
O23 C27 H27 109.4 . . ? 
C26 C27 H27 109.4 . . ? 
O11 C7 C12 106.3(3) . . ? 
O11 C7 C11 109.9(3) . . ? 
C12 C7 C11 113.9(3) . . ? 
O11 C7 H7 108.9 . . ? 
C12 C7 H7 108.9 . . ? 
C11 C7 H7 108.9 . . ? 
O1 C2 O5 111.9(3) . . ? 
O1 C2 C3 106.7(3) . . ? 
O5 C2 C3 110.4(3) . . ? 
O1 C2 H2 109.3 . . ? 
O5 C2 H2 109.3 . . ? 
C3 C2 H2 109.3 . . ? 
O23 C23 C28 106.6(3) . . ? 
O23 C23 C24 109.5(3) . . ? 
C28 C23 C24 113.3(3) . . ? 
O23 C23 H23 109.1 . . ? 
C28 C23 H23 109.1 . . ? 
C24 C23 H23 109.1 . . ? 
O20 C26 C25 110.4(3) . . ? 
O20 C26 C27 106.6(3) . . ? 
C25 C26 C27 111.1(3) . . ? 
O20 C26 H26 109.6 . . ? 
C25 C26 H26 109.6 . . ? 
C27 C26 H26 109.6 . . ? 
O2 C3 C2 108.0(3) . . ? 
O2 C3 C4 108.9(3) . . ? 
C2 C3 C4 112.2(3) . . ? 
O2 C3 H3 109.3 . . ? 
C2 C3 H3 109.3 . . ? 
C4 C3 H3 109.3 . . ? 
O12 C12 C7 112.9(3) . . ? 
O12 C12 H12A 109.0 . . ? 
C7 C12 H12A 109.0 . . ? 
O12 C12 H12B 109.0 . . ? 
C7 C12 H12B 109.0 . . ? 
H12A C12 H12B 107.8 . . ? 
O13 C20 C21 107.2(3) . . ? 
O13 C20 C19 110.2(3) . . ? 
C21 C20 C19 111.0(3) . . ? 
O13 C20 H20 109.5 . . ? 
C21 C20 H20 109.5 . . ? 
C19 C20 H20 109.5 . . ? 
O9 C10 C9 108.7(3) . . ? 
O9 C10 C11 110.1(3) . . ? 
C9 C10 C11 110.6(3) . . ? 
O9 C10 H10 109.2 . . ? 
C9 C10 H10 109.2 . . ? 
C11 C10 H10 109.2 . . ? 
O18 C22 C18 113.3(3) . . ? 
O18 C22 H22A 108.9 . . ? 
C18 C22 H22A 108.9 . . ? 
O18 C22 H22B 108.9 . . ? 
C18 C22 H22B 108.9 . . ? 
H22A C22 H22B 107.7 . . ? 
O36 C40 O32 112.6(3) . . ? 
O36 C40 C39 106.5(3) . . ? 
O32 C40 C39 110.9(3) . . ? 
O36 C40 H40 108.9 . . ? 
O32 C40 H40 108.9 . . ? 
C39 C40 H40 108.9 . . ? 
O31 C41 C36 113.3(3) . . ? 
O31 C41 H41A 108.9 . . ? 
C36 C41 H41A 108.9 . . ? 
O31 C41 H41B 108.9 . . ? 
C36 C41 H41B 108.9 . . ? 
H41A C41 H41B 107.7 . . ? 
O22 C24 C25 110.5(3) . . ? 
O22 C24 C23 107.7(3) . . ? 
C25 C24 C23 111.1(3) . . ? 
O22 C24 H24 109.2 . . ? 
C25 C24 H24 109.2 . . ? 
C23 C24 H24 109.2 . . ? 
O6 C6 C1 112.3(3) . . ? 
O6 C6 H6A 109.1 . . ? 
C1 C6 H6A 109.1 . . ? 
O6 C6 H6B 109.1 . . ? 
C1 C6 H6B 109.1 . . ? 
H6A C6 H6B 107.9 . . ? 
O10 C11 C7 107.9(3) . . ? 
O10 C11 C10 110.8(3) . . ? 
C7 C11 C10 111.8(3) . . ? 
O10 C11 H11 108.8 . . ? 
C7 C11 H11 108.8 . . ? 
C10 C11 H11 108.8 . . ? 
O16 C19 C20 108.8(3) . . ? 
O16 C19 C35 109.2(3) . . ? 
C20 C19 C35 110.6(3) . . ? 
O16 C19 H19 109.4 . . ? 
C20 C19 H19 109.4 . . ? 
C35 C19 H19 109.4 . . ? 
O24 C28 C23 113.7(3) . . ? 
O24 C28 H28A 108.8 . . ? 
C23 C28 H28A 108.8 . . ? 
O24 C28 H28B 108.8 . . ? 
C23 C28 H28B 108.8 . . ? 
H28A C28 H28B 107.7 . . ? 
O5 C1 C6 107.7(3) . . ? 
O5 C1 C5 110.1(3) . . ? 
C6 C1 C5 112.4(3) . . ? 
O5 C1 H1 108.8 . . ? 
C6 C1 H1 108.8 . . ? 
C5 C1 H1 108.8 . . ? 
O8 C9 C8 107.2(3) . . ? 
O8 C9 C10 110.4(3) . . ? 
C8 C9 C10 111.6(3) . . ? 
O8 C9 H9 109.2 . . ? 
C8 C9 H9 109.2 . . ? 
C10 C9 H9 109.2 . . ? 
C21 O15 C18 115.8(3) . . ? 
C8 O7 Li2 116.0(3) . . ? 
C8 O7 H7A 102(4) . . ? 
Li2 O7 H7A 119(4) . . ? 
C2 O1 Li3 115.1(3) . . ? 
C2 O1 H1A 103(3) . . ? 
Li3 O1 H1A 123(3) . . ? 
C11 O10 Li2 150.8(3) . 3_554 ? 
C11 O10 H10A 108(4) . . ? 
Li2 O10 H10A 97(4) 3_554 . ? 
C35 O17 Li3 147.2(3) . 2_665 ? 
C35 O17 H17 106(3) . . ? 
Li3 O17 H17 107(3) 2_665 . ? 
C8 O11 C7 115.8(3) . . ? 
C5 O4 H4A 109.5 . . ? 
C3 O2 Li3 111.9(3) . . ? 
C3 O2 H2A 116.0(15) . . ? 
Li3 O2 H2A 131.3(18) . . ? 
C2 O5 C1 114.1(3) . . ? 
C20 O13 Li3 109.9(3) . . ? 
C20 O13 H13 112(3) . . ? 
Li3 O13 H13 135(3) . . ? 
C9 O8 Li2 111.7(3) . . ? 
C9 O8 H8A 117.8(17) . . ? 
Li2 O8 H8A 130.5(17) . . ? 
C10 O9 H9A 109.5 . . ? 
C12 O12 H12 109.5 . . ? 
C19 O16 H16 109.5 . . ? 
C6 O6 H6 109.5 . . ? 
C4 O3 H3A 109.5 . . ? 
C22 O18 H18A 109.5 . . ? 
C27 O23 C23 115.0(3) . . ? 
C26 O20 Li1 112.7(3) . . ? 
C26 O20 H20A 110(3) . . ? 
Li1 O20 H20A 138(3) . . ? 
C27 O19 Li1 117.7(3) . . ? 
C27 O19 H19A 118(4) . . ? 
Li1 O19 H19A 103(4) . . ? 
C25 O21 H21A 109.5 . . ? 
C24 O22 Li1 150.6(3) . 3_664 ? 
C24 O22 H22 106(4) . . ? 
Li1 O22 H22 102(4) 3_664 . ? 
C28 O24 H24A 109.5 . . ? 
C34 O26 Li1 115.1(3) . . ? 
C34 O26 H26A 94(4) . . ? 
Li1 O26 H26A 128(4) . . ? 
C31 O28 Li1 146.0(3) . 2_655 ? 
C31 O28 H28 111(3) . . ? 
Li1 O28 H28 101(3) 2_655 . ? 
C29 O29 H29 109.5 . . ? 
C33 O25 Li1 112.3(3) . . ? 
C33 O25 H25A 113(4) . . ? 
Li1 O25 H25A 135(4) . . ? 
C32 O27 H27A 109.5 . . ? 
C34 O30 C30 114.9(3) . . ? 
O27 C32 C31 107.4(3) . . ? 
O27 C32 C33 111.7(3) . . ? 
C31 C32 C33 109.8(3) . . ? 
O27 C32 H32 109.3 . . ? 
C31 C32 H32 109.3 . . ? 
C33 C32 H32 109.3 . . ? 
O26 C34 O30 112.3(3) . . ? 
O26 C34 C33 106.5(3) . . ? 
O30 C34 C33 109.8(3) . . ? 
O26 C34 H34A 109.4 . . ? 
O30 C34 H34A 109.4 . . ? 
C33 C34 H34A 109.4 . . ? 
O28 C31 C32 109.9(3) . . ? 
O28 C31 C30 108.9(3) . . ? 
C32 C31 C30 110.8(3) . . ? 
O28 C31 H31A 109.1 . . ? 
C32 C31 H31A 109.1 . . ? 
C30 C31 H31A 109.1 . . ? 
O30 C30 C29 108.0(3) . . ? 
O30 C30 C31 109.3(3) . . ? 
C29 C30 C31 112.9(3) . . ? 
O30 C30 H30 108.9 . . ? 
C29 C30 H30 108.9 . . ? 
C31 C30 H30 108.9 . . ? 
O25 C33 C32 109.8(3) . . ? 
O25 C33 C34 107.1(3) . . ? 
C32 C33 C34 112.3(3) . . ? 
O25 C33 H33A 109.2 . . ? 
C32 C33 H33A 109.2 . . ? 
C34 C33 H33A 109.2 . . ? 
O29 C29 C30 112.6(3) . . ? 
O29 C29 H29A 109.1 . . ? 
C30 C29 H29A 109.1 . . ? 
O29 C29 H29B 109.1 . . ? 
C30 C29 H29B 109.1 . . ? 
H29A C29 H29B 107.8 . . ? 
O17 C35 C18 107.3(3) . . ? 
O17 C35 C19 110.8(3) . . ? 
C18 C35 C19 111.4(3) . . ? 
O17 C35 H35 109.1 . . ? 
C18 C35 H35 109.1 . . ? 
C19 C35 H35 109.1 . . ? 
O34 C38 C37 106.8(3) . . ? 
O34 C38 C39 110.9(3) . . ? 
C37 C38 C39 110.8(3) . . ? 
O34 C38 H38 109.4 . . ? 
C37 C38 H38 109.4 . . ? 
C39 C38 H38 109.4 . . ? 
C40 O36 Li2 118.7(3) . . ? 
C40 O36 H36A 113(4) . . ? 
Li2 O36 H36A 108(4) . . ? 
C37 O33 Li2 150.0(3) . 2 ? 
C37 O33 H33 117.8(17) . . ? 
Li2 O33 H33 89(2) 2 . ? 
C38 O34 H34 109.5 . . ? 
C40 O32 C36 113.9(3) . . ? 
C41 O31 H31 109.5 . . ? 
C39 O35 Li2 112.4(3) . . ? 
C39 O35 H35A 110(3) . . ? 
Li2 O35 H35A 135(3) . . ? 
O26 Li1 O19 124.8(4) . . ? 
O26 Li1 O22 101.3(3) . 2_655 ? 
O19 Li1 O22 132.8(4) . 2_655 ? 
O26 Li1 O25 75.9(2) . . ? 
O19 Li1 O25 89.0(3) . . ? 
O22 Li1 O25 113.8(3) 2_655 . ? 
O26 Li1 O20 87.2(3) . . ? 
O19 Li1 O20 73.7(2) . . ? 
O22 Li1 O20 101.7(3) 2_655 . ? 
O25 Li1 O20 142.8(4) . . ? 
O26 Li1 O28 140.0(3) . 3_664 ? 
O19 Li1 O28 77.9(2) . 3_664 ? 
O22 Li1 O28 71.9(2) 2_655 3_664 ? 
O25 Li1 O28 71.8(2) . 3_664 ? 
O20 Li1 O28 132.7(3) . 3_664 ? 
O36 Li2 O7 122.9(4) . . ? 
O36 Li2 O10 101.3(3) . 2 ? 
O7 Li2 O10 133.1(4) . 2 ? 
O36 Li2 O8 84.0(3) . . ? 
O7 Li2 O8 74.9(2) . . ? 
O10 Li2 O8 96.9(3) 2 . ? 
O36 Li2 O35 73.7(2) . . ? 
O7 Li2 O35 92.5(3) . . ? 
O10 Li2 O35 116.2(3) 2 . ? 
O8 Li2 O35 142.8(4) . . ? 
O36 Li2 O33 144.1(4) . 3_554 ? 
O7 Li2 O33 78.2(2) . 3_554 ? 
O10 Li2 O33 73.8(2) 2 3_554 ? 
O8 Li2 O33 131.6(3) . 3_554 ? 
O35 Li2 O33 76.9(2) . 3_554 ? 
O14 Li3 O17 125.2(4) . 3_564 ? 
O14 Li3 O1 124.6(4) . . ? 
O17 Li3 O1 109.6(3) 3_564 . ? 
O14 Li3 O2 92.0(3) . . ? 
O17 Li3 O2 108.8(3) 3_564 . ? 
O1 Li3 O2 76.4(3) . . ? 
O14 Li3 O13 75.3(2) . . ? 
O17 Li3 O13 102.8(3) 3_564 . ? 
O1 Li3 O13 86.4(3) . . ? 
O2 Li3 O13 147.6(4) . . ? 
 
loop_ 
 _geom_torsion_atom_site_label_1 
 _geom_torsion_atom_site_label_2 
 _geom_torsion_atom_site_label_3 
 _geom_torsion_atom_site_label_4 
 _geom_torsion 
 _geom_torsion_site_symmetry_1 
 _geom_torsion_site_symmetry_2 
 _geom_torsion_site_symmetry_3 
 _geom_torsion_site_symmetry_4 
 _geom_torsion_publ_flag 
O4 C5 C4 O3 -63.5(4) . . . . ? 
C1 C5 C4 O3 175.1(3) . . . . ? 
O4 C5 C4 C3 173.9(3) . . . . ? 
C1 C5 C4 C3 52.6(4) . . . . ? 
O33 C37 C36 O32 -178.0(3) . . . . ? 
C38 C37 C36 O32 -57.5(4) . . . . ? 
O33 C37 C36 C41 62.6(4) . . . . ? 
C38 C37 C36 C41 -176.9(3) . . . . ? 
Li3 O14 C21 O15 -168.2(3) . . . . ? 
Li3 O14 C21 C20 -48.0(4) . . . . ? 
O21 C25 C26 O20 71.2(4) . . . . ? 
C24 C25 C26 O20 -168.6(3) . . . . ? 
O21 C25 C26 C27 -170.8(3) . . . . ? 
C24 C25 C26 C27 -50.6(4) . . . . ? 
O19 C27 C26 O20 52.1(4) . . . . ? 
O23 C27 C26 O20 174.0(3) . . . . ? 
O19 C27 C26 C25 -68.1(4) . . . . ? 
O23 C27 C26 C25 53.8(4) . . . . ? 
O1 C2 C3 O2 51.0(4) . . . . ? 
O5 C2 C3 O2 172.8(3) . . . . ? 
O1 C2 C3 C4 -69.0(4) . . . . ? 
O5 C2 C3 C4 52.9(4) . . . . ? 
O3 C4 C3 O2 69.6(4) . . . . ? 
C5 C4 C3 O2 -170.8(3) . . . . ? 
O3 C4 C3 C2 -171.0(3) . . . . ? 
C5 C4 C3 C2 -51.4(4) . . . . ? 
O11 C7 C12 O12 -61.1(4) . . . . ? 
C11 C7 C12 O12 60.1(4) . . . . ? 
O14 C21 C20 O13 53.9(4) . . . . ? 
O15 C21 C20 O13 175.3(3) . . . . ? 
O14 C21 C20 C19 -66.4(4) . . . . ? 
O15 C21 C20 C19 54.9(4) . . . . ? 
O15 C18 C22 O18 -61.0(4) . . . . ? 
C35 C18 C22 O18 59.9(4) . . . . ? 
O35 C39 C40 O36 49.2(4) . . . . ? 
C38 C39 C40 O36 -69.4(4) . . . . ? 
O35 C39 C40 O32 172.0(3) . . . . ? 
C38 C39 C40 O32 53.4(4) . . . . ? 
O32 C36 C41 O31 -63.5(4) . . . . ? 
C37 C36 C41 O31 56.6(4) . . . . ? 
O21 C25 C24 O22 -69.8(4) . . . . ? 
C26 C25 C24 O22 170.2(3) . . . . ? 
O21 C25 C24 C23 170.7(3) . . . . ? 
C26 C25 C24 C23 50.7(4) . . . . ? 
O23 C23 C24 O22 -174.4(3) . . . . ? 
C28 C23 C24 O22 66.7(4) . . . . ? 
O23 C23 C24 C25 -53.3(4) . . . . ? 
C28 C23 C24 C25 -172.2(3) . . . . ? 
O11 C7 C11 O10 -174.7(3) . . . . ? 
C12 C7 C11 O10 66.1(4) . . . . ? 
O11 C7 C11 C10 -52.7(4) . . . . ? 
C12 C7 C11 C10 -171.9(3) . . . . ? 
O9 C10 C11 O10 -68.0(4) . . . . ? 
C9 C10 C11 O10 171.9(3) . . . . ? 
O9 C10 C11 C7 171.7(3) . . . . ? 
C9 C10 C11 C7 51.6(4) . . . . ? 
O13 C20 C19 O16 68.9(4) . . . . ? 
C21 C20 C19 O16 -172.5(3) . . . . ? 
O13 C20 C19 C35 -171.1(3) . . . . ? 
C21 C20 C19 C35 -52.5(4) . . . . ? 
O23 C23 C28 O24 -62.1(4) . . . . ? 
C24 C23 C28 O24 58.5(4) . . . . ? 
O6 C6 C1 O5 -64.5(4) . . . . ? 
O6 C6 C1 C5 57.0(4) . . . . ? 
O4 C5 C1 O5 -177.4(3) . . . . ? 
C4 C5 C1 O5 -56.0(4) . . . . ? 
O4 C5 C1 C6 62.6(4) . . . . ? 
C4 C5 C1 C6 -176.1(3) . . . . ? 
O7 C8 C9 O8 52.4(4) . . . . ? 
O11 C8 C9 O8 174.7(3) . . . . ? 
O7 C8 C9 C10 -68.6(4) . . . . ? 
O11 C8 C9 C10 53.7(4) . . . . ? 
O9 C10 C9 O8 68.0(4) . . . . ? 
C11 C10 C9 O8 -171.1(3) . . . . ? 
O9 C10 C9 C8 -172.9(3) . . . . ? 
C11 C10 C9 C8 -51.9(4) . . . . ? 
O14 C21 O15 C18 58.3(4) . . . . ? 
C20 C21 O15 C18 -59.3(4) . . . . ? 
C22 C18 O15 C21 -179.1(3) . . . . ? 
C35 C18 O15 C21 57.9(4) . . . . ? 
O11 C8 O7 Li2 -162.8(3) . . . . ? 
C9 C8 O7 Li2 -41.6(4) . . . . ? 
O5 C2 O1 Li3 -162.7(3) . . . . ? 
C3 C2 O1 Li3 -41.8(4) . . . . ? 
C7 C11 O10 Li2 37.3(8) . . . 3_554 ? 
C10 C11 O10 Li2 -85.3(7) . . . 3_554 ? 
O7 C8 O11 C7 61.5(4) . . . . ? 
C9 C8 O11 C7 -57.8(4) . . . . ? 
C12 C7 O11 C8 -179.2(3) . . . . ? 
C11 C7 O11 C8 57.1(4) . . . . ? 
C2 C3 O2 Li3 -37.8(4) . . . . ? 
C4 C3 O2 Li3 84.2(4) . . . . ? 
O1 C2 O5 C1 60.7(4) . . . . ? 
C3 C2 O5 C1 -58.0(4) . . . . ? 
C6 C1 O5 C2 -177.0(3) . . . . ? 
C5 C1 O5 C2 60.1(4) . . . . ? 
C21 C20 O13 Li3 -36.6(4) . . . . ? 
C19 C20 O13 Li3 84.2(3) . . . . ? 
C8 C9 O8 Li2 -40.1(4) . . . . ? 
C10 C9 O8 Li2 81.7(4) . . . . ? 
O19 C27 O23 C23 57.4(4) . . . . ? 
C26 C27 O23 C23 -60.3(4) . . . . ? 
C28 C23 O23 C27 -177.0(3) . . . . ? 
C24 C23 O23 C27 60.0(4) . . . . ? 
C25 C26 O20 Li1 81.7(4) . . . . ? 
C27 C26 O20 Li1 -39.0(4) . . . . ? 
O23 C27 O19 Li1 -164.4(3) . . . . ? 
C26 C27 O19 Li1 -44.2(4) . . . . ? 
C25 C24 O22 Li1 -94.1(6) . . . 3_664 ? 
C23 C24 O22 Li1 27.4(7) . . . 3_664 ? 
Li1 O26 C34 O30 -164.9(3) . . . . ? 
Li1 O26 C34 C33 -44.7(4) . . . . ? 
C30 O30 C34 O26 60.5(4) . . . . ? 
C30 O30 C34 C33 -57.7(4) . . . . ? 
Li1 O28 C31 C32 -19.8(6) 2_655 . . . ? 
Li1 O28 C31 C30 101.8(5) 2_655 . . . ? 
O27 C32 C31 O28 -63.9(4) . . . . ? 
C33 C32 C31 O28 174.4(3) . . . . ? 
O27 C32 C31 C30 175.7(3) . . . . ? 
C33 C32 C31 C30 54.0(4) . . . . ? 
C34 O30 C30 C29 -176.8(3) . . . . ? 
C34 O30 C30 C31 60.0(4) . . . . ? 
O28 C31 C30 O30 -177.7(3) . . . . ? 
C32 C31 C30 O30 -56.6(4) . . . . ? 
O28 C31 C30 C29 62.1(4) . . . . ? 
C32 C31 C30 C29 -176.8(3) . . . . ? 
Li1 O25 C33 C32 85.7(4) . . . . ? 
Li1 O25 C33 C34 -36.4(4) . . . . ? 
O27 C32 C33 O25 69.6(4) . . . . ? 
C31 C32 C33 O25 -171.2(3) . . . . ? 
O27 C32 C33 C34 -171.4(3) . . . . ? 
C31 C32 C33 C34 -52.3(4) . . . . ? 
O26 C34 C33 O25 51.8(4) . . . . ? 
O30 C34 C33 O25 173.5(3) . . . . ? 
O26 C34 C33 C32 -68.8(4) . . . . ? 
O30 C34 C33 C32 53.0(4) . . . . ? 
O30 C30 C29 O29 -64.8(4) . . . . ? 
C31 C30 C29 O29 56.2(4) . . . . ? 
Li3 O17 C35 C18 18.5(7) 2_665 . . . ? 
Li3 O17 C35 C19 -103.4(6) 2_665 . . . ? 
O15 C18 C35 O17 -173.9(3) . . . . ? 
C22 C18 C35 O17 66.9(4) . . . . ? 
O15 C18 C35 C19 -52.5(4) . . . . ? 
C22 C18 C35 C19 -171.6(3) . . . . ? 
O16 C19 C35 O17 -69.2(4) . . . . ? 
C20 C19 C35 O17 171.0(3) . . . . ? 
O16 C19 C35 C18 171.4(3) . . . . ? 
C20 C19 C35 C18 51.6(4) . . . . ? 
O33 C37 C38 O34 -64.7(4) . . . . ? 
C36 C37 C38 O34 175.3(3) . . . . ? 
O33 C37 C38 C39 174.5(3) . . . . ? 
C36 C37 C38 C39 54.5(4) . . . . ? 
O35 C39 C38 O34 71.3(4) . . . . ? 
C40 C39 C38 O34 -170.6(3) . . . . ? 
O35 C39 C38 C37 -170.3(3) . . . . ? 
C40 C39 C38 C37 -52.2(4) . . . . ? 
O32 C40 O36 Li2 -163.7(3) . . . . ? 
C39 C40 O36 Li2 -42.0(4) . . . . ? 
C38 C37 O33 Li2 -20.3(7) . . . 2 ? 
C36 C37 O33 Li2 100.2(6) . . . 2 ? 
O36 C40 O32 C36 59.5(4) . . . . ? 
C39 C40 O32 C36 -59.7(4) . . . . ? 
C41 C36 O32 C40 -176.2(3) . . . . ? 
C37 C36 O32 C40 61.3(4) . . . . ? 
C40 C39 O35 Li2 -36.4(4) . . . . ? 
C38 C39 O35 Li2 83.4(4) . . . . ? 
C34 O26 Li1 O19 -58.8(5) . . . . ? 
C34 O26 Li1 O22 131.9(3) . . . 2_655 ? 
C34 O26 Li1 O25 19.9(3) . . . . ? 
C34 O26 Li1 O20 -126.7(3) . . . . ? 
C34 O26 Li1 O28 56.7(6) . . . 3_664 ? 
C27 O19 Li1 O26 -56.1(5) . . . . ? 
C27 O19 Li1 O22 109.5(5) . . . 2_655 ? 
C27 O19 Li1 O25 -128.2(3) . . . . ? 
C27 O19 Li1 O20 18.5(3) . . . . ? 
C27 O19 Li1 O28 160.3(3) . . . 3_664 ? 
C33 O25 Li1 O26 11.1(3) . . . . ? 
C33 O25 Li1 O19 137.4(3) . . . . ? 
C33 O25 Li1 O22 -85.2(4) . . . 2_655 ? 
C33 O25 Li1 O20 76.6(6) . . . . ? 
C33 O25 Li1 O28 -145.1(3) . . . 3_664 ? 
C26 O20 Li1 O26 141.0(3) . . . . ? 
C26 O20 Li1 O19 13.4(3) . . . . ? 
C26 O20 Li1 O22 -118.1(3) . . . 2_655 ? 
C26 O20 Li1 O25 78.9(6) . . . . ? 
C26 O20 Li1 O28 -42.0(5) . . . 3_664 ? 
C40 O36 Li2 O7 -64.5(5) . . . . ? 
C40 O36 Li2 O10 131.9(3) . . . 2 ? 
C40 O36 Li2 O8 -132.2(3) . . . . ? 
C40 O36 Li2 O35 17.7(3) . . . . ? 
C40 O36 Li2 O33 54.0(7) . . . 3_554 ? 
C8 O7 Li2 O36 -56.6(5) . . . . ? 
C8 O7 Li2 O10 101.0(5) . . . 2 ? 
C8 O7 Li2 O8 15.8(3) . . . . ? 
C8 O7 Li2 O35 -128.7(3) . . . . ? 
C8 O7 Li2 O33 155.2(3) . . . 3_554 ? 
C9 O8 Li2 O36 141.4(3) . . . . ? 
C9 O8 Li2 O7 15.0(3) . . . . ? 
C9 O8 Li2 O10 -117.9(3) . . . 2 ? 
C9 O8 Li2 O35 88.7(6) . . . . ? 
C9 O8 Li2 O33 -43.5(5) . . . 3_554 ? 
C39 O35 Li2 O36 12.2(3) . . . . ? 
C39 O35 Li2 O7 135.8(3) . . . . ? 
C39 O35 Li2 O10 -82.6(4) . . . 2 ? 
C39 O35 Li2 O8 67.7(6) . . . . ? 
C39 O35 Li2 O33 -146.9(3) . . . 3_554 ? 
C21 O14 Li3 O17 117.4(4) . . . 3_564 ? 
C21 O14 Li3 O1 -53.1(5) . . . . ? 
C21 O14 Li3 O2 -127.9(3) . . . . ? 
C21 O14 Li3 O13 21.9(3) . . . . ? 
C2 O1 Li3 O14 -65.8(5) . . . . ? 
C2 O1 Li3 O17 122.5(4) . . . 3_564 ? 
C2 O1 Li3 O2 17.1(3) . . . . ? 
C2 O1 Li3 O13 -135.2(3) . . . . ? 
C3 O2 Li3 O14 137.9(3) . . . . ? 
C3 O2 Li3 O17 -93.7(4) . . . 3_564 ? 
C3 O2 Li3 O1 12.7(3) . . . . ? 
C3 O2 Li3 O13 72.6(7) . . . . ? 
C20 O13 Li3 O14 10.2(3) . . . . ? 
C20 O13 Li3 O17 -113.2(3) . . . 3_564 ? 
C20 O13 Li3 O1 137.5(3) . . . . ? 
C20 O13 Li3 O2 80.1(7) . . . . ? 
 
loop_ 
 _geom_hbond_atom_site_label_D 
 _geom_hbond_atom_site_label_H 
 _geom_hbond_atom_site_label_A 
 _geom_hbond_distance_DH 
 _geom_hbond_distance_HA 
 _geom_hbond_distance_DA 
 _geom_hbond_angle_DHA 
 _geom_hbond_site_symmetry_A 
O14 H14 O31  0.88(2) 1.79(2) 2.673(4) 179(5) 3_564 
O7 H7A O24  0.87(2) 1.87(2) 2.732(4) 170(6) 2_655 
O1 H1A O12  0.86(2) 1.89(2) 2.705(4) 159(4) 2_665 
O10 H10A O33  0.78(6) 2.25(6) 2.787(4) 126(5) 2_554 
O17 H17 O3  0.78(5) 2.09(5) 2.847(4) 166(5) 3_565 
O2 H2A O32  0.89(2) 2.06(2) 2.870(4) 150(2) 3_564 
O13 H13 O11  0.86(2) 2.01(3) 2.813(3) 154(5) 2_665 
O8 H8A O30  0.87(2) 2.12(2) 2.852(4) 140.4(19) 3_564 
O20 H20A O15  0.877(19) 1.94(2) 2.775(4) 159(4) 3_564 
O19 H19A O6  0.89(2) 1.79(3) 2.662(4) 166(6) 2_765 
O22 H22 O28  0.85(2) 2.27(5) 2.811(4) 121(5) 2_654 
O26 H26A O18  0.88(2) 1.88(3) 2.692(4) 154(6) 3_564 
O36 H36A O29  0.868(19) 1.790(17) 2.634(4) 164(4) 3_564 
O35 H35A O23  0.87(2) 2.02(2) 2.866(4) 165(5) 2_655 
 
_diffrn_measured_fraction_theta_max    0.964 
_diffrn_reflns_theta_full              66.41 
_diffrn_measured_fraction_theta_full   0.963 
_refine_diff_density_max    0.361 
_refine_diff_density_min   -0.408 
_refine_diff_density_rms    0.069 
